# Supplementary material for: Diffusion Tensor Imaging Reveals Deep Brain Structure Changes in Early Parkinson’s Disease Patients with Various Sleep Disorders
Source: MDPI journal article supplement (doi:10.3390/brainsci12040463), 2022-03-30
Supplement: s1 [file s1]

**Table S1.** The mean score for the PDSS-2 and its each item in PD patients.

|                 | <b>N</b> | <b>Mean±SE</b> |
|-----------------|----------|----------------|
| Subitem.1       | 36       | 2.11 ± 0.206   |
| Subitem.2       | 36       | 1.72 ± 0.202   |
| Subitem.3       | 36       | 1.86 ± 0.170   |
| Subitem.4       | 36       | 0.97 ± 0.141   |
| Subitem.5       | 36       | 0.97 ± 0.116   |
| Subitem.6       | 36       | 1.86 ± 0.211   |
| Subitem.7       | 36       | 0.50 ± 0.141   |
| Subitem.8       | 36       | 2.14 ± 0.160   |
| Subitem.9       | 36       | 1.17 ± 0.180   |
| Subitem.10      | 36       | 0.86 ± 0.150   |
| Subitem.11      | 36       | 1.39 ± 0.188   |
| Subitem.12      | 36       | 0.61 ± 0.145   |
| Subitem.13      | 36       | 1.39 ± 0.208   |
| Subitem.14      | 36       | 1.22 ± 0.183   |
| Subitem.15      | 36       | 0.67 ± 0.149   |
| Total of PDSS-2 | 36       | 19.44 ± 1.359  |
